# Supplementary material
Source: PubMed Central journal article supplement (PMC3171798)

## FIGURE LEGENDS

Supplemental Figure 1. Sustained antigen presentation by conventional DCs is not sufficient to induce GC T<sub>FH</sub> formation. 10<sup>5</sup> CD90.1<sup>+</sup> OTII T cells were transferred into either WT or CD11c/A<sub>β</sub><sup>b</sup> mice and next day the mice were immunized with NP-OVA/alum. On day 3, some mice were administered 10 μg OVA peptide i.v. or left untreated and analyzed at day 7 p.i.. (A) Total number of OTII and OTII T<sub>FH</sub> present in immunized WT or CD11c/A<sub>β</sub><sup>b</sup> recipients (n=3-4 mice). (B) Representative FACS gating strategy to identify PD1<sup>hi</sup>CXCR5<sup>+</sup> within activated OTII T<sub>FH</sub> (C) The numbers of GC T<sub>FH</sub> (n=3-4, 2 independent experiments). (D) Expression of IL-21 transcript in FACS sorted OT-II T<sub>FH</sub> compared to levels found in naïve T cells. Results are representative of 2 independent experiments. (E) Expression of IL-17A transcript in OTII polarized towards T<sub>FH</sub> or Th17 relative to naïve OTII using β-actin as an endogenous control. (F) Expression of IL-17A transcript in FACS sorted OT-II T<sub>FH</sub> or T<sub>eff</sub> (CD90.1<sup>+</sup>CD62L<sup>lo</sup>CXCR5<sup>lo/neg</sup>) compared to levels found in naïve T cells. \* denotes statistical significance of 0.01 < p < 0.05 in a two-tailed t test at α=0.05

Supplemental Figure 2. Impaired GC formation in the absence of B cell antigen presentation. 10<sup>6</sup> OTII T cells were transferred into WT and CD11c/A<sub>β</sub><sup>b</sup> mice and mice were immunized with NP-OVA/alum. (A) Representative FACS gating strategy to identify splenic GC B cells as CD19<sup>+</sup> IgD<sup>-</sup> Fas<sup>+</sup> cells. (B) The total number of GC B cells in WT or CD11c/A<sub>β</sub><sup>b</sup> at d7 p.i. or non-immunized WT mice. (n=4-5 mice, representative of >5 Experiments) (C) Total number of IgM and IgG1 Antibody Secreting Cells (ASCs) present in immunized WT or CD11c/A<sub>β</sub><sup>b</sup> recipients on d7 p.i. or in control non-immunized WT mice (n=4-5 mice, representative of 3 Experiments), enumerated via ELISPOT.

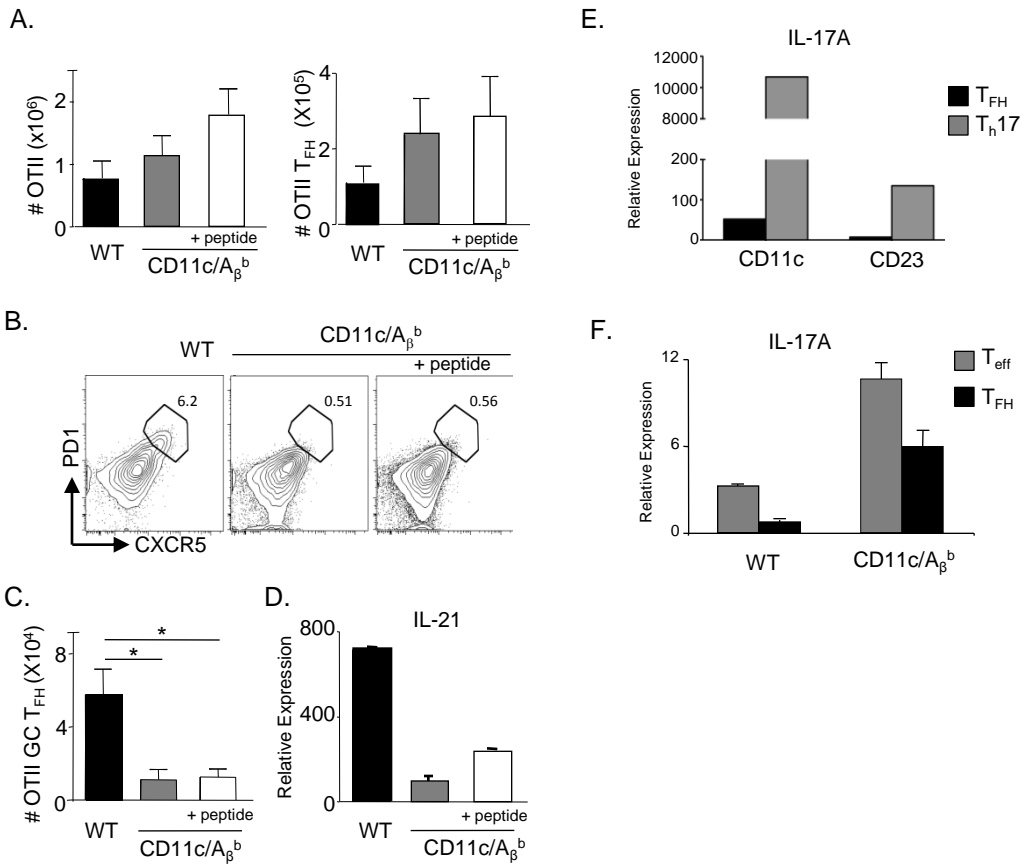

A.

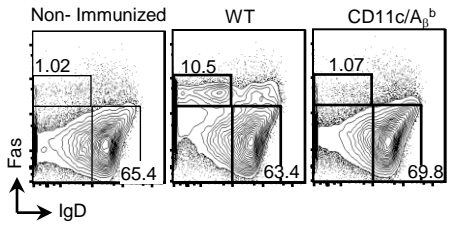

B.

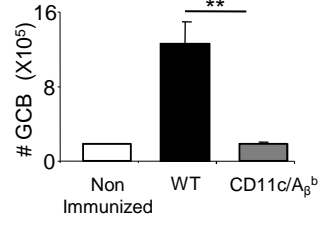

C.

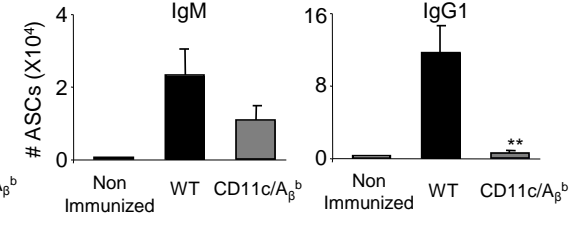

Supplement: NIHMS303078-supplement-1.pdf [file NIHMS303078-supplement-1.pdf]
